# Supplementary material for: Tagetes erecta as an organic precursor: synthesis of highly fluorescent CQDs for the micromolar tracing of ferric ions in human blood serum
Source: Royal Society of Chemistry journal article supplement (doi:10.1039/d1ra01571k), 2021-01-01
Supplement: d1ra01571k1.pdf [file d1ra01571k1.pdf]

## Appendix A. Supporting Information

### **Tagetes Erecta as an organic precursor: Synthesis of highly fluorescent CQDs for the micromolar tracing of ferric ions in human blood serum**

Pinky Sagar<sup>ψ</sup>, Gopal Krishna Gupta<sup>#</sup>, Monika Srivastava<sup>φ</sup>, Amit Srivastava<sup>#</sup>, S. K. Srivastava<sup>ψ\*</sup>

<sup>ψ</sup>Department of Physics, Institute of Science, Banaras Hindu University, Varanasi, 221005, India.

<sup>#</sup>Department of Physics, TDPG College, VBS Purvanchal University, Jaunpur, India-222001

<sup>φ</sup>School of Materials Science and Technology, IIT (BHU) Varanasi, India- 221005

\*Corresponding Author's Email address: sanjay\_itbhu@yahoo.com

#### **Table of Contents (12 Pages)**

**Section A. Supporting Figures: (Pages S1-S7)**

Figure S1----Figure S9

**Section B. Supporting Tables: (Pages S7-S8)**

Table S1----Table S2

## Section B. Supporting Figures:

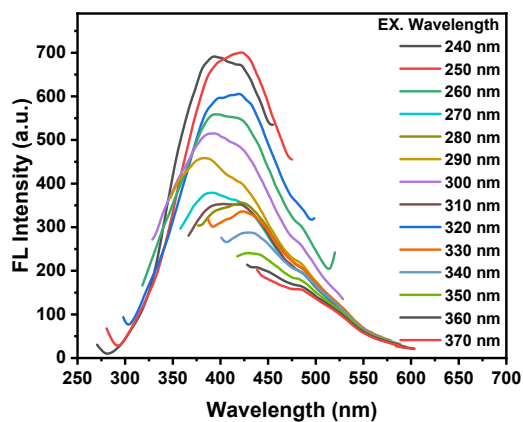

**Figure S1.** Photoluminescence spectra of CQDs at different excitation wavelengths

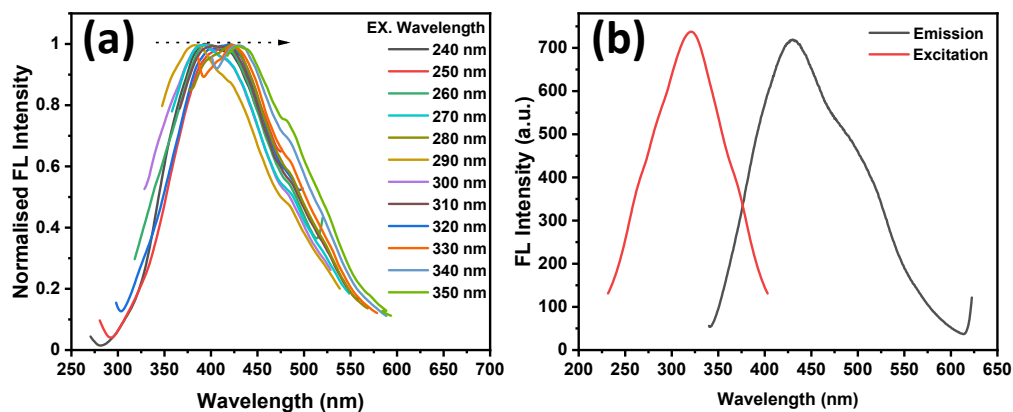

**Figure S2.** (a) Normalised FL intensity of CQDs depicting the clear red shift at different excitation wavelengths and (b) Excitation profile (Red) at emission wavelength,  $\lambda_{em}=425$  nm and emission profile (Black) at excitation wavelength,  $\lambda_{ex}=320$  nm peak centered at  $\sim 320$  nm and  $\sim 425$  nm respectively

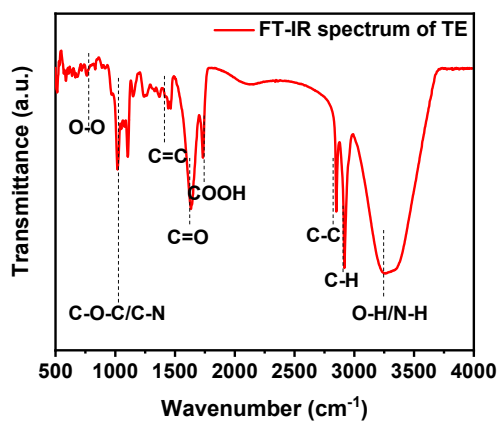

Figure S3. FT-IR spectrum of TE

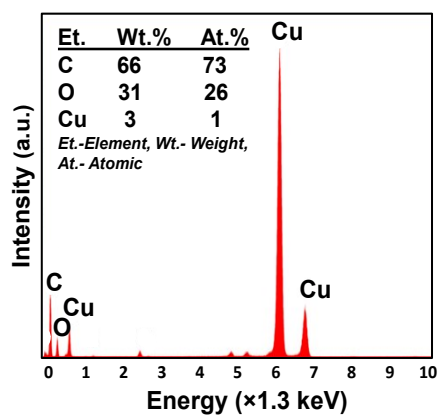

Figure S4. EDX profile of TE-CQDs

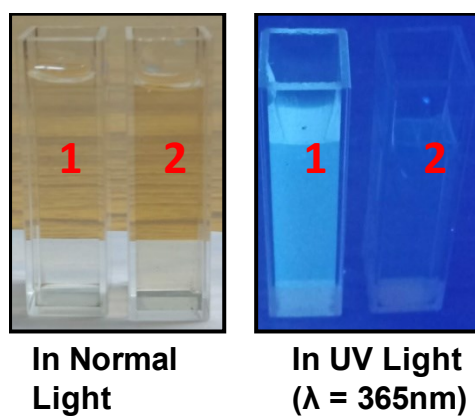

Figure S5. 1 and 2 demonstrating optical image of CQDs and CQDs + Fe<sup>3+</sup>, respectively in presence of normal light and UV light (λ = 365 nm)

*Modified S-V plot for standard solution*

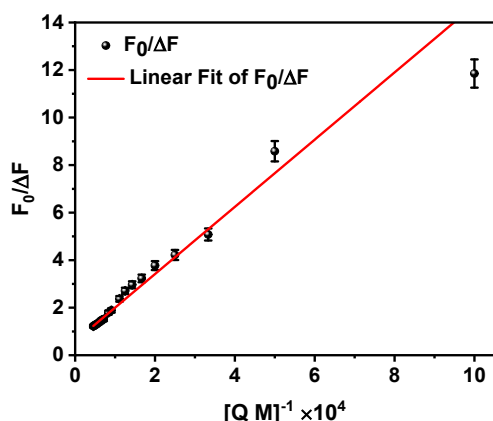

**Figure S6.** Modified S-V plot for the sensing of Fe<sup>3+</sup> in standard solution

*Modified S-V plot for HBS sample 1*

Similar to standard solution, S-V plot has been plotted and observed that the relative intensity vs concentration curve is exponential, which is quite good agreement of blood serum sample 1 with standard solution. Similarly, for better understanding we have plotted modified S-V plot (Figure S7) followed by forthcoming equation:

$$\frac{F_0}{\Delta F} = \frac{1}{f_a K_a (Q)} + \frac{1}{f_a}$$

The estimated values of the  $f_a^{-1}$  and  $(f_a K_a)^{-1}$  are  $\sim 0.289$  and  $\sim 2.10$  M, respectively, demonstrating that most of the initial FL intensity was approachable by the quencher. This tends that 14% of maximum of FL intensity was quenched by quencher. Furthermore, the quenching constant  $K_a$  has a value  $\sim 1.4 \times 10^3$  M<sup>-1</sup> which is  $\sim 16$  % of the collision quenching phenomena derived constant and suggests a defined way of the quenching by quencher towards the CQDs FL intensity

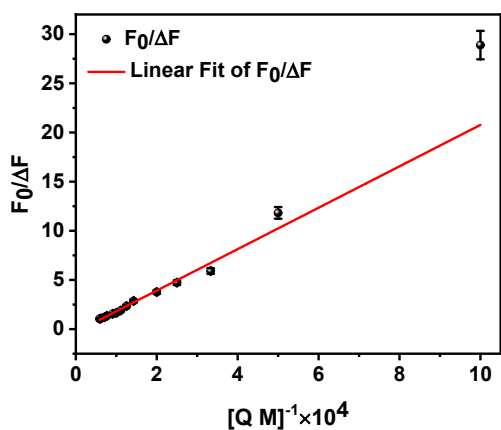

**Figure S7.** Modified S-V plot for the sensing of  $\text{Fe}^{3+}$  in HBS sample 1

### *Linearity of probe*

It was observed that the S-V plot is linear for some short range of gradual addition of  $\text{Fe}^{3+}$  ion solution while the overall graph obtained was exponential; fit depicting the complex quenching of FL. The complex quenching nature showed that there must be three different linear regions corresponding to each quenching species. But here we get only one linear plot showing the good linearity of the sensing probe with S-V constant  $K_{s-v} = 7.5 \times 10^3 \text{ M}^{-1}$ ,  $8.7 \times 10^3 \text{ M}^{-1}$  with regression coefficient  $R^2 = 0.99$  in both cases (standard solution and HBS) as shown in Figure S8.

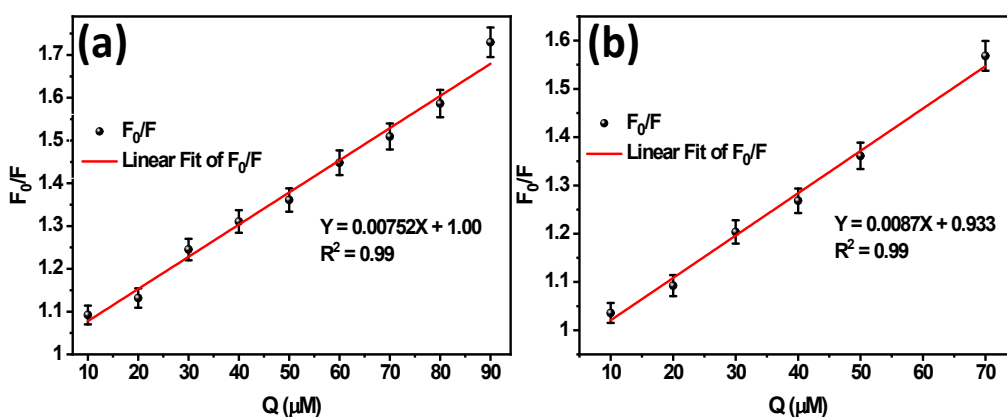

**Figure S8.** Linear fit of S-V plot for the concentration range of  $\text{Fe}^{3+}$  in (a) standard solution (b) HBS sample 1

*FL quenching analysis for the HBS sample2*

FL quenching study has been performed for HBS sample 2 also. The results have been displayed in Figure S9 depicting the good agreement with the studies for standard solution and HBS sample 1. Further, comparative study of the present work is shown in Table S2.

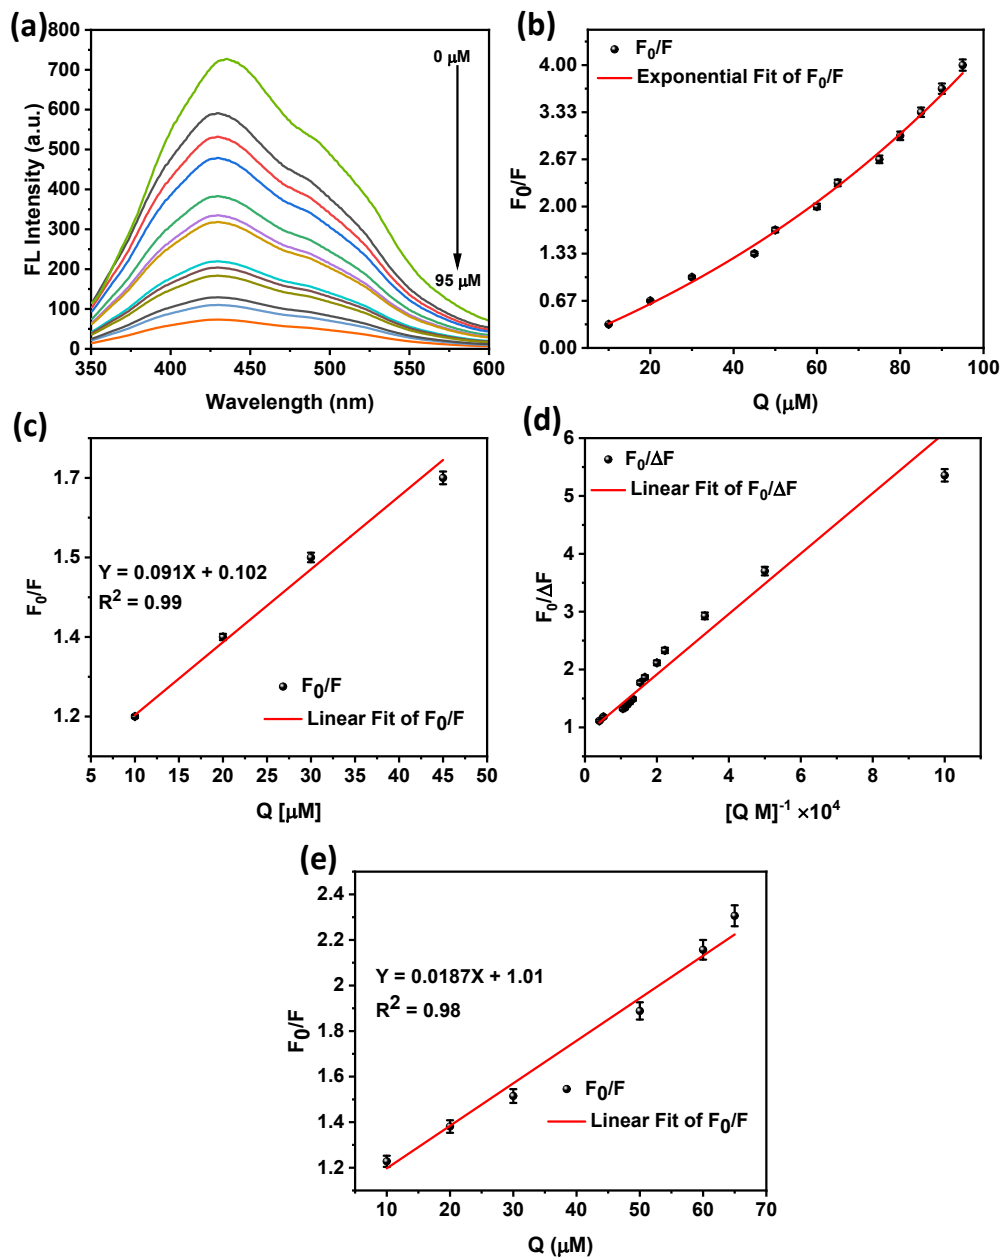

**Figure S9.** (a) FL quenching plot (b) Exponential fit of S-V plot (c) Linear fit of S-V plot (d) Modified S-V plot and (e) normalised FL intensity vs. log[blood serum Fe<sup>3+</sup>] plot for the calculation of LOD in the solution of TE-CQDs upon the addition of HBS sample2

**Section B. Supporting Tables:**

*TRPL spectroscopy analysis of sensing probe*

**TableS1.** Decay time of TE-CQDs in presence of different concentrations of Fe<sup>3+</sup> ions

| Conc. of Fe <sup>3+</sup> | $\tau_1(\text{ns})$ | $\tau_2(\text{ns})$ | $\tau_3(\text{ns})$ | $\sim \tau_{av}$<br>(ns) | $\tau_0 / \tau_{av}$ |
|---------------------------|---------------------|---------------------|---------------------|--------------------------|----------------------|
| 0                         | 1.8535              | 0.60562             | 6.05982             | 2.83                     | 1                    |
| 10                        | 1.80603             | 0.57695             | 5.83148             | 2.73                     | 1.03                 |
| 20                        | 1.71447             | 0.56922             | 5.34463             | 2.57                     | 1.07                 |
| 30                        | 1.69233             | 0.52221             | 5.50963             | 2.54                     | 1.09                 |
| 40                        | 1.68596             | 0.55662             | 5.40341             | 2.55                     | 1.11                 |
| 50                        | 1.64476             | 0.49623             | 5.49316             | 2.54                     | 1.13                 |
| 60                        | 1.55471             | 0.44828             | 5.28276             | 2.42                     | 1.16                 |
| 70                        | 1.47459             | 0.42191             | 5.06344             | 2.31                     | 1.22                 |
| 80                        | 1.46834             | 0.43099             | 4.96987             | 2.29                     | 1.23                 |
| 140                       | 0.86816             | 0.10763             | 3.35158             | 1.98                     | 1.43                 |
| 200                       | 0.4559              | 0.04537             | 3.2208              | 1.24                     | 2.28                 |

**Table S2.** Brief study of the present work

| Name | Previously | Addition | $K_{S-V}$ | LOD | Linearity range |
|------|------------|----------|-----------|-----|-----------------|
|------|------------|----------|-----------|-----|-----------------|

|                              | <b>Fe<sup>3+</sup>/Iron<br/>concentration</b> | <b>of<br/>Fe<sup>3+</sup>/HBS<br/>during the<br/>experiment<br/>(<math>\mu</math>M)</b> |                   | <b>(<math>\mu</math>M)</b> | <b>(<math>\mu</math>M)</b> |
|------------------------------|-----------------------------------------------|-----------------------------------------------------------------------------------------|-------------------|----------------------------|----------------------------|
| <b>Standard<br/>solution</b> | 0                                             | 0-220                                                                                   | $7.5 \times 10^3$ | 0.37                       | 0-90                       |
| <b>HBS sample1</b>           | 63.8 mg/dL<br>(11.42 $\mu$ M)                 | 0-170                                                                                   | $8.7 \times 10^3$ | 0.36                       | 0-70                       |
| <b>HBS sample2</b>           | 20.2 mg/dL<br>(3.61 $\mu$ M)                  | 0-95                                                                                    | -                 | 0.59                       | 0-50                       |

The quantitative *in vitro* determination of Iron in HBS has been performed by Rx series instruments (Randox Laboratories Ltd. Crumlin, County Antrim, BT29 4QY, United Kingdom) which include Rx Daytona and Rx Imola (R1. Buffer, R2. Chromogen).
